# Supplementary material
Source: PubMed Central journal article supplement (PMC3458225)

## Supporting Information

### Supporting Information Figure Legend

Waveforms of Cyclic Voltammetry. Panel A. Input voltage waveform to the potentiostat ( $-0.2$  to  $+1.0$  V vs Ag/AgCl). Panel B. Output current signal from a nCFM in KRBB. The applied voltage profile (Panel A) generated a current versus time profile that was stable over time ( $>10$  minutes) and allowed us to measure the Faradaic current (i.e. generated from the oxidation and reduction of monoamines) within the larger background capacitive current. To obtain the Faradaic current versus input voltage profile (Panel C), the current versus time profile obtained with  $100$   $\mu\text{M}$  DA,  $50$   $\mu\text{M}$  DA,  $1$   $\mu\text{M}$  DA,  $250$  nM DA or  $5$   $\mu\text{M}$  Serotonin (5-HT) in KRBB was subtracted from the profile obtained in KRBB alone. The average cyclic voltammogram (averaged over  $> 10$  cycles) for each concentration of monoamine used is shown in panel C. The obtained oxidation and reduction peaks for DA ( $+220$  mV and  $+120$  mV respectively) were similar to those reported for CV performed under similar conditions[64-66].

Table 1 List of primer pairs used for RT-PCR

| <b>Transcript ID</b>   | <b>Primers 5'→3'</b> |                                  | <b>Amplicon Length (bp)</b> |
|------------------------|----------------------|----------------------------------|-----------------------------|
| <b>D2R L and D2R S</b> | 4hD2_F               | CCCACCTGAGGGCTCCACTA             | 321 (D2R L) and 234 (D2R S) |
|                        | 3hD2_R               | TGGCAATCTTGGGGTGGTCT             |                             |
|                        | 4hD2_F               | CCCACCTGAGGGCTCCACTA             | 619 (D2R L) and 532 (D2R S) |
|                        | 4hD2_R               | AGGAAGGCCTTGCGGAACTC             |                             |
| <b>D2R</b>             | 2hD2_F               | GCTGTGGCCATGCCCATGCT             | 288                         |
|                        | 2hD2_R               | TCGGCTGCTGCGTTTGGTGT             |                             |
| <b>D2R L</b>           | Long_hD2_F           | CCATCGTCTGGGTCTGTCC              | 335                         |
|                        | Long_hD2_R           | CCGCCTGTTCCTGGGAAAC              |                             |
| <b>D2R S</b>           | Short_hD2_F          | TCCACTAAAGGAGGCTGCCC             | 215                         |
|                        | 3hD2_R               | TGGCAATCTTGGGGTGGTCT             |                             |
| <b>ACTB</b>            | Hs_ACTB_2_SG         | From QIAGEN<br>Cat.No.QT01680476 | 104                         |
| <b>INS</b>             | Hs_INS_2_SG          | From QIAGEN<br>Cat.No.QT01531040 | 98                          |
| <b>VMAT2</b>           | Hs_SLC18A2_1_SG      | From QIAGEN<br>Cat.No.QT00059857 | 73                          |
| <b>DAT1</b>            | Hs_SLC6A3_1_SG       | From QIAGEN<br>Cat.No.QT00000231 | 74                          |
| <b>LAT1</b>            | Hs_SLC7A5_1_SG       | From QIAGEN<br>Cat.No.QT00089145 | 106                         |
| <b>MDU1</b>            | Hs_SLC3A2_1_SG       | From QIAGEN<br>Cat.No.QT00085897 | 126                         |

## References

1. Doménech A, García H, Doménech-Carbó MT, Galletero MS (2001) 2,4,6-Triphenylpyrylium Ion Encapsulated into Zeolite Y as a Selective Electrode for the Electrochemical Determination of Dopamine in the Presence of Ascorbic Acid. *Analytical Chemistry* 74: 562-569.
2. Zen J-M, Chen P-J (1997) A Selective Voltammetric Method for Uric Acid and Dopamine Detection Using Clay-Modified Electrodes. *Analytical Chemistry* 69: 5087-5093.
3. Wiedemann DJ, Basse-Tomusk A, Wilson RL, Rebec GV, Wightman RM (1990) Interference by DOPAC and ascorbate during attempts to measure drug-induced changes in neostriatal dopamine with Nafion-coated, carbon-fiber electrodes. *J Neurosci Methods* 35: 9-18.

**A**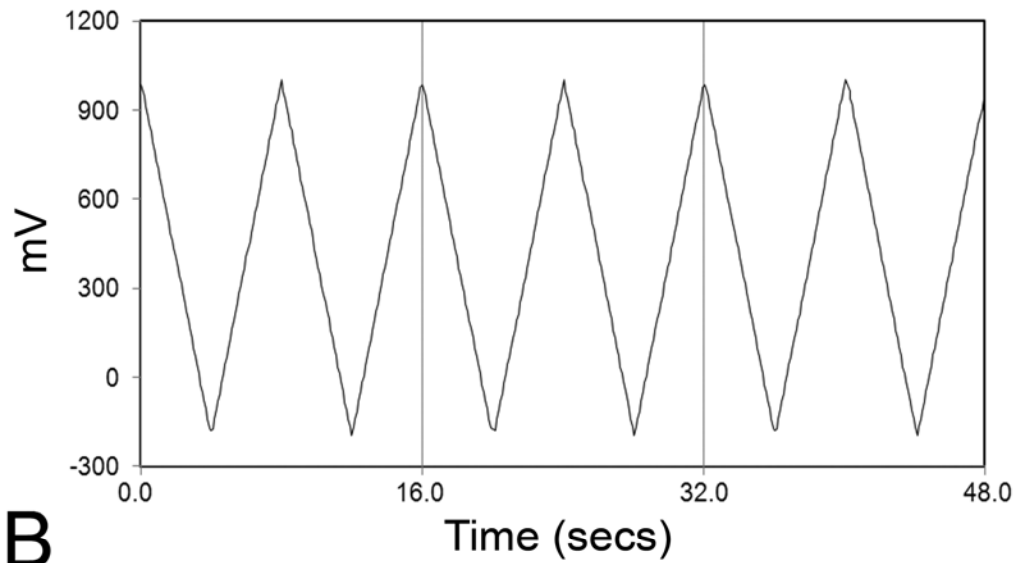**B**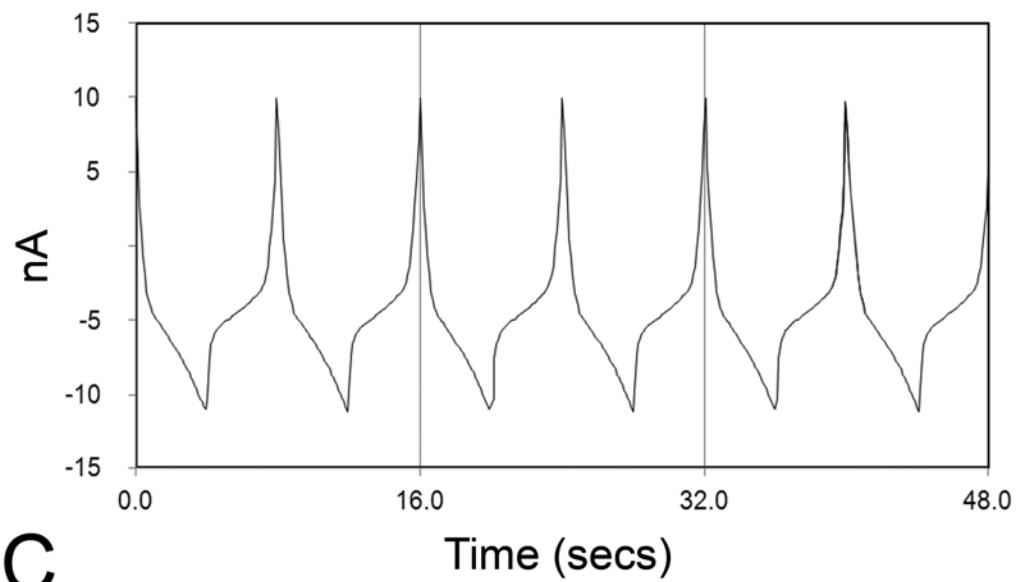**C**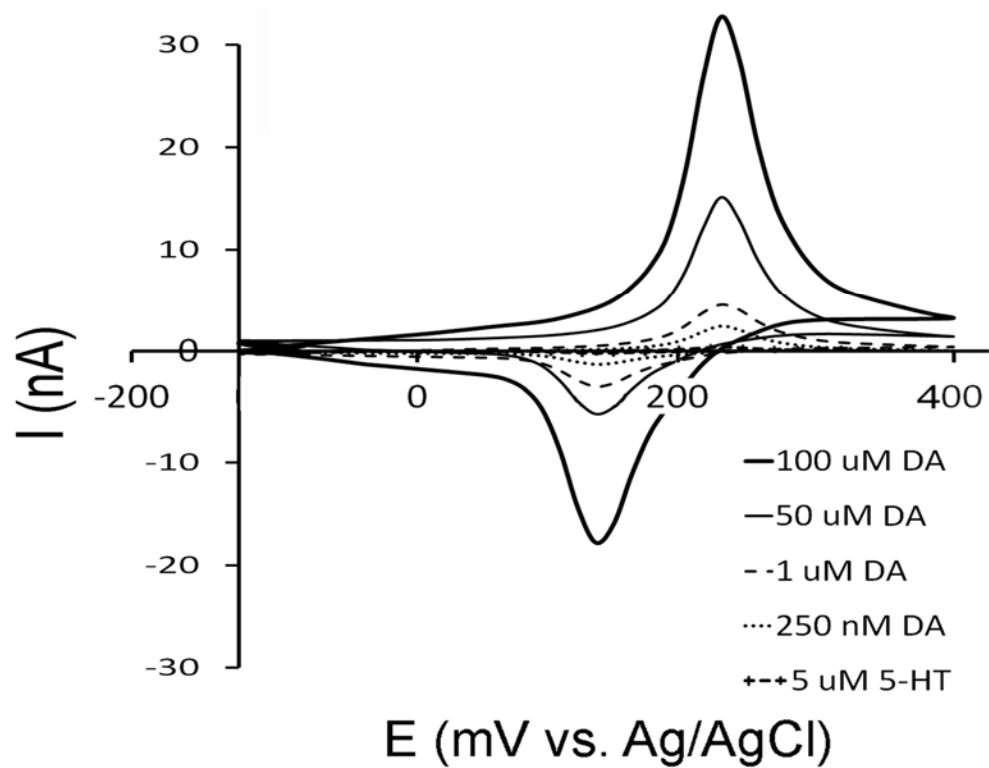

Supplement: supp_me.2012-1101_ME-12-1101__Figure_Legend_and_Table_.pdf [file supp_me.2012-1101_ME-12-1101__Figure_Legend_and_Table_.pdf]
